# Supplementary material for: Preliminary Evaluation of the HOBO Data Logging Rain Gauge at the Chuzhou Hydrological Experiment Station, China
Source: Hindawi journal article supplement (doi:10.1155/2019/5947976), 2019-11-04
Supplement: f1 [file 5947976.f1.pdf]

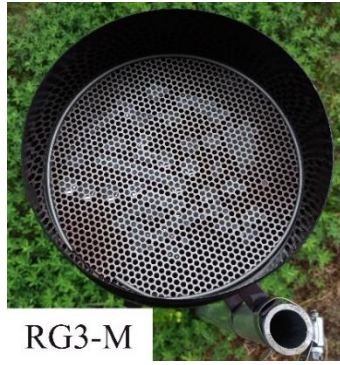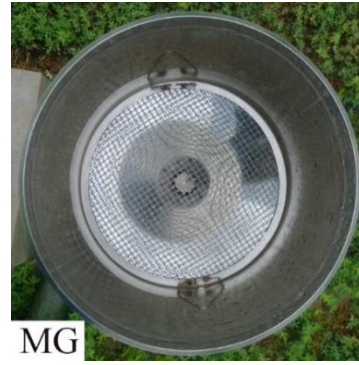

Figure: Comparison of screen strainer and mesh size between RG3-M and manual gauge. Note that the screen mesh of RG3-M usually forms a thin liquid film during rainfall which easily makes raindrops rebounding out of the strainer. Thus, more raindrops splash out of the RG3-M gauge than those of manual gauge, especially for the storm with high intensity.
